# Supplementary material for: Reduced suppressive effect of β2-adrenoceptor agonist on fibrocyte function in severe asthma
Source: Springer Nature journal article supplement (doi:10.1186/s12931-017-0678-7), 2017-11-20

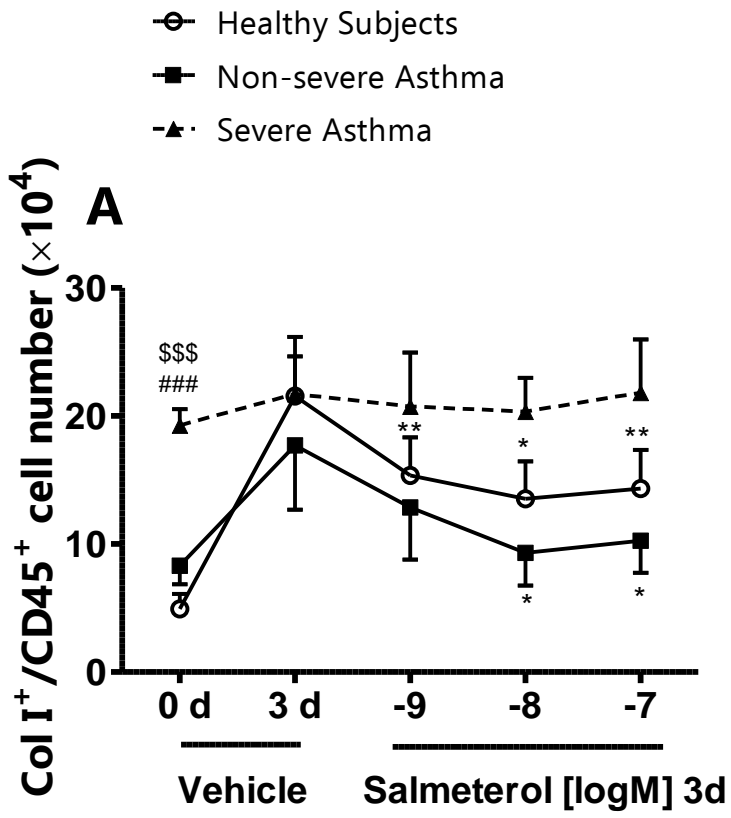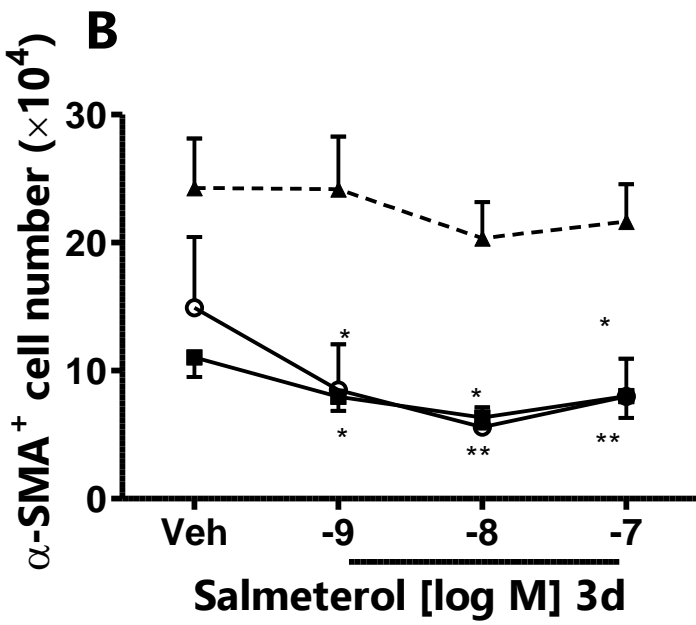

Supplement: MOESM2 [file 15240914]
