# Supplementary material for: Reduced suppressive effect of β2-adrenoceptor agonist on fibrocyte function in severe asthma
Source: Springer Nature journal article supplement (doi:10.1186/s12931-017-0678-7), 2017-11-20
Supplement: MOESM3 [file 15240914]

## Supplementary Figure S1

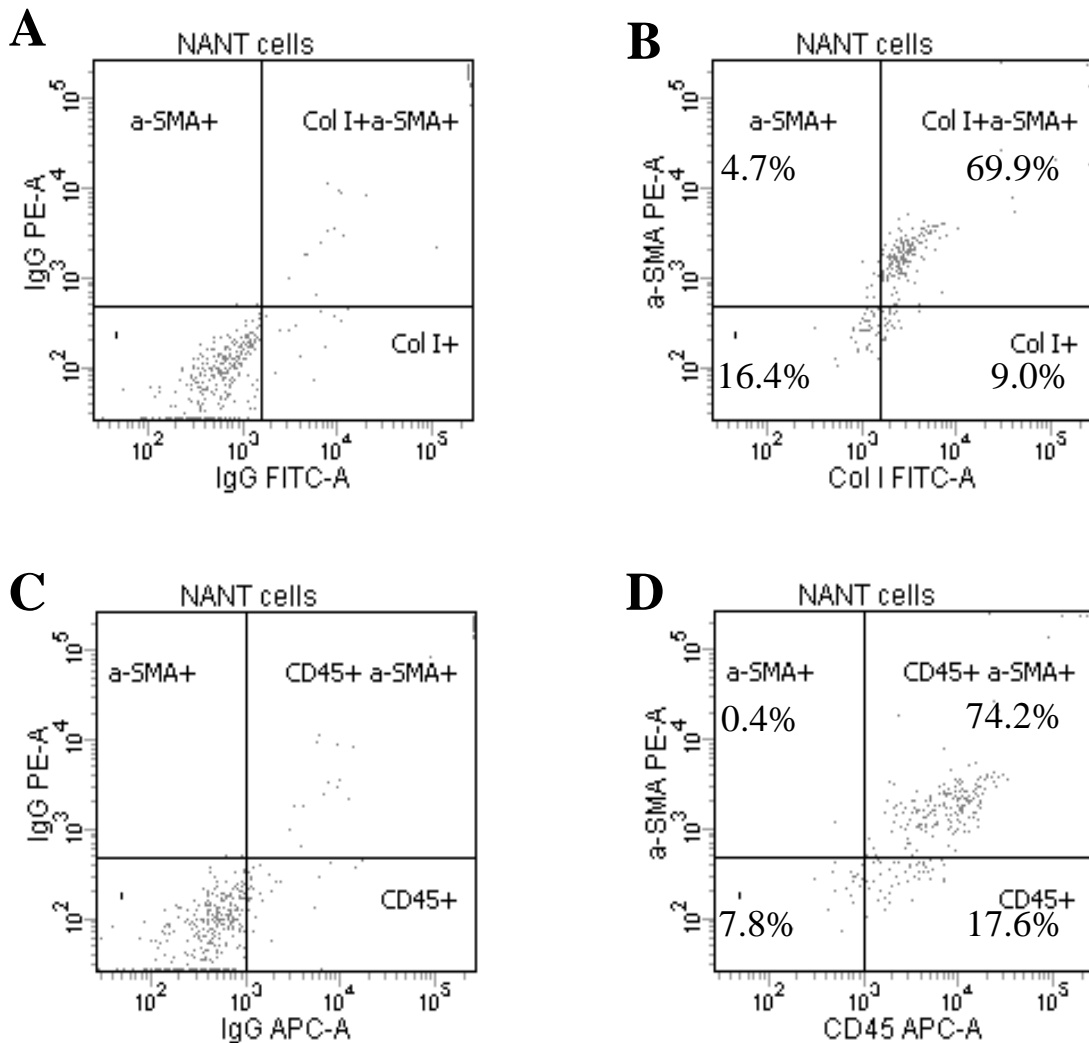

**Figure S1:** *The expression of collagen I and CD45 on  $\alpha$ -smooth muscle actin-positive cells.* NANT cells from one healthy subject were harvested after 3 days in culture and stained with antibodies for collagen I (Col I),  $\alpha$ - smooth muscle actin (SMA) and CD45 or their respective IgG isotype controls (**A** and **C**). The percentage of Col I+/ $\alpha$ -SMA+ (**B**) and CD45+/ $\alpha$ -SMA+ cells (**D**) was determined by flow cytometry.
