# Supplementary material for: Reduced suppressive effect of β2-adrenoceptor agonist on fibrocyte function in severe asthma
Source: Springer Nature journal article supplement (doi:10.1186/s12931-017-0678-7), 2017-11-20
Supplement: MOESM4 [file 15240914]

## Supplementary Figure S2

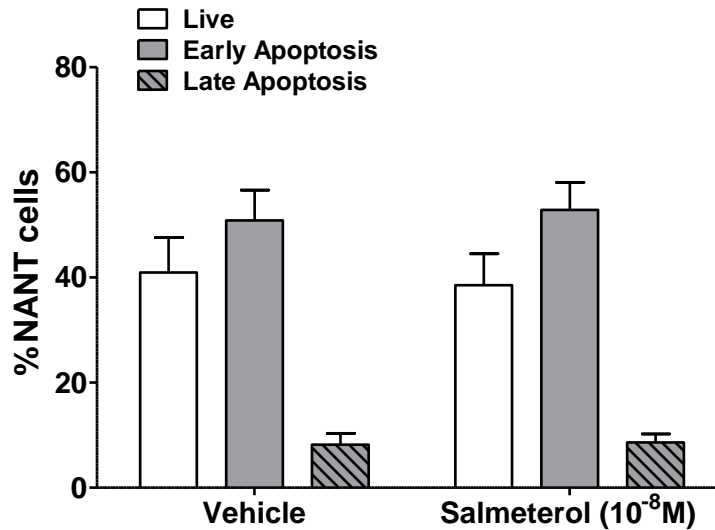

**Figure S2:** Effect of salmeterol on NANT cell apoptosis. NANT cells from healthy subjects (n=6) were treated with salmeterol ( $10^{-8}$ M) for 3 days and the percentage of live, and early and late apoptotic NANT cells was determined. Bars represent mean  $\pm$  SEM.
