# Supplementary material for: Reduced suppressive effect of β2-adrenoceptor agonist on fibrocyte function in severe asthma
Source: Springer Nature journal article supplement (doi:10.1186/s12931-017-0678-7), 2017-11-20
Supplement: MOESM5 [file 15240914]

## Supplementary Figure S4

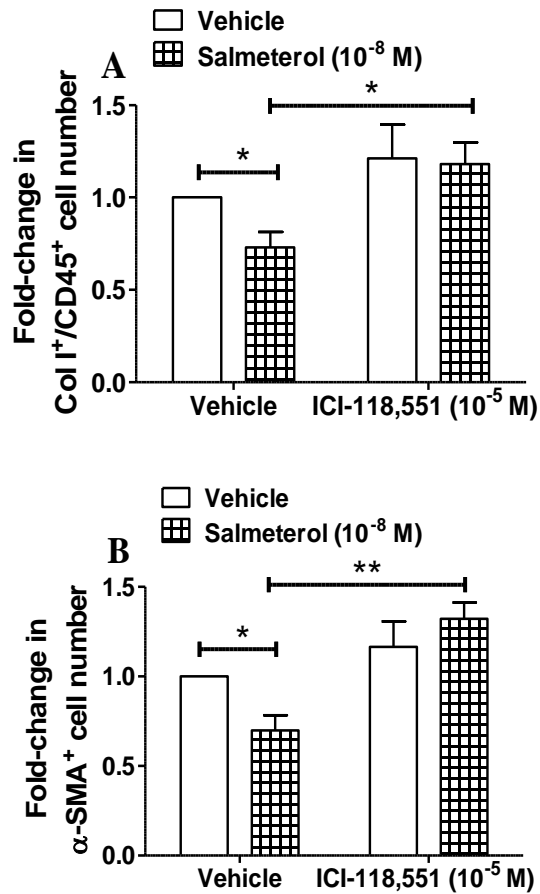

**Figure S4: Effect of ICI-118,551 on salmeterol-mediated reduction in fibrocyte number and differentiation.** NANT cells from healthy subjects (n=6) were treated with salmeterol (10<sup>-8</sup>M) in the presence or absence of ICI-118,551 (10<sup>-5</sup>M) for 3 days. The number of fibrocytes (Col I<sup>+</sup>/CD45<sup>+</sup> cells; A) and differentiating fibrocytes ( $\alpha$ -SMA<sup>+</sup> cells; B) was determined. Bars represent mean  $\pm$  SEM. \*  $p < 0.05$  and \*\*  $p < 0.01$ .
